# Supplementary material for: The senescence-associated secretory phenotype (SASP) from mesenchymal stromal cells impairs growth of immortalized prostate cells but has no effect on metastatic prostatic cancer cells
Source: publisher site journal article supplement (doi:10.18632/aging.102172), 2019-08-14
Supplement: Supplementary file [file aging-v11i15-102172-supplementary-material-SD3.pdf]

UPL14.0 New! PANTHER14.0 is generated from the 2018\_04 release of ReferenceProteome dataset

PANTHER GENE LIST [Customize Gene list](#)

Convert List to:  Send list to:

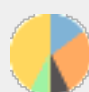

Display:  items per page [Refine Search](#)

Hits 1-12 of 12 [ page: (1) ] Number of mapped ids found 12

Species Filter:

| <input type="button" value="clr"/> <input type="button" value="all"/> | Gene ID                                               | Mapped IDs                        | Gene Name<br>Gene<br>Symbol<br><br>Ortholog                                                              | PANTHER<br>Family/Subfamily                                           | PANTHER<br>Protein<br>Class | Species      |
|-----------------------------------------------------------------------|-------------------------------------------------------|-----------------------------------|----------------------------------------------------------------------------------------------------------|-----------------------------------------------------------------------|-----------------------------|--------------|
| <input type="checkbox"/>                                              | <a href="#">1. HUMAN HGNC=11655 UniProtKB=P17987</a>  | HUMAN HGNC=11655 UniProtKB=P17987 | T-complex protein 1 subunit alpha<br><a href="#">TCP1</a><br><a href="#">ortholog</a>                    | T-COMPLEX PROTEIN 1 SUBUNIT ALPHA<br>(PTHR11353:SF195)                | <a href="#">chaperonin</a>  | Homo sapiens |
| <input type="checkbox"/>                                              | <a href="#">2. HUMAN HGNC=1615 UniProtKB=P78371</a>   | HUMAN HGNC=1615 UniProtKB=P78371  | T-complex protein 1 subunit beta<br><a href="#">CCT2</a><br><a href="#">ortholog</a>                     | T-COMPLEX PROTEIN 1 SUBUNIT BETA<br>(PTHR11353:SF23)                  | <a href="#">chaperonin</a>  | Homo sapiens |
| <input type="checkbox"/>                                              | <a href="#">3. HUMAN HGNC=5269 UniProtKB=P61604</a>   | HUMAN HGNC=5269 UniProtKB=P61604  | 10 kDa heat shock protein, mitochondrial<br><a href="#">HSPE1</a><br><a href="#">ortholog</a>            | 10 KDA HEAT SHOCK PROTEIN, MITOCHONDRIAL<br>(PTHR10772:SF0)           | <a href="#">chaperonin</a>  | Homo sapiens |
| <input type="checkbox"/>                                              | <a href="#">4. HUMAN HGNC=1622 UniProtKB=Q99832</a>   | HUMAN HGNC=1622 UniProtKB=Q99832  | T-complex protein 1 subunit eta<br><a href="#">CCT7</a><br><a href="#">ortholog</a>                      | T-COMPLEX PROTEIN 1 SUBUNIT ETA<br>(PTHR11353:SF22)                   | <a href="#">chaperonin</a>  | Homo sapiens |
| <input type="checkbox"/>                                              | <a href="#">5. HUMAN HGNC=1621 UniProtKB=Q92526</a>   | HUMAN HGNC=1621 UniProtKB=Q92526  | T-complex protein 1 subunit zeta-2<br><a href="#">CCT6B</a><br><a href="#">ortholog</a>                  | T-COMPLEX PROTEIN 1 SUBUNIT ZETA-2<br>(PTHR11353:SF58)                | <a href="#">chaperonin</a>  | Homo sapiens |
| <input type="checkbox"/>                                              | <a href="#">6. HUMAN HGNC=11579 UniProtKB=O75347</a>  | HUMAN HGNC=11579 UniProtKB=O75347 | Tubulin-specific chaperone A<br><a href="#">TBCA</a><br><a href="#">ortholog</a>                         | TUBULIN-SPECIFIC CHAPERONE A<br>(PTHR21500:SF3)                       | <a href="#">chaperonin</a>  | Homo sapiens |
| <input type="checkbox"/>                                              | <a href="#">7. HUMAN HGNC=1623 UniProtKB=P50990</a>   | HUMAN HGNC=1623 UniProtKB=P50990  | T-complex protein 1 subunit theta<br><a href="#">CCT8</a><br><a href="#">ortholog</a>                    | T-COMPLEX PROTEIN 1 SUBUNIT THETA<br>(PTHR11353:SF78)                 | <a href="#">chaperonin</a>  | Homo sapiens |
| <input type="checkbox"/>                                              | <a href="#">8. HUMAN HGNC=32153 UniProtKB=A6NM43</a>  | HUMAN HGNC=32153 UniProtKB=A6NM43 | Putative T-complex protein 1 subunit theta-like 1<br><a href="#">CCT8L1P</a><br><a href="#">ortholog</a> | T-COMPLEX PROTEIN 1 SUBUNIT THETA-LIKE 1-RELATED<br>(PTHR11353:SF100) | <a href="#">chaperonin</a>  | Homo sapiens |
| <input type="checkbox"/>                                              | <a href="#">9. HUMAN HGNC=1616 UniProtKB=P49368</a>   | HUMAN HGNC=1616 UniProtKB=P49368  | T-complex protein 1 subunit gamma<br><a href="#">CCT3</a><br><a href="#">ortholog</a>                    | T-COMPLEX PROTEIN 1 SUBUNIT GAMMA<br>(PTHR11353:SF24)                 | <a href="#">chaperonin</a>  | Homo sapiens |
| <input type="checkbox"/>                                              | <a href="#">10. HUMAN HGNC=1620 UniProtKB=P40227</a>  | HUMAN HGNC=1620 UniProtKB=P40227  | T-complex protein 1 subunit zeta<br><a href="#">CCT6A</a><br><a href="#">ortholog</a>                    | T-COMPLEX PROTEIN 1 SUBUNIT ZETA<br>(PTHR11353:SF54)                  | <a href="#">chaperonin</a>  | Homo sapiens |
| <input type="checkbox"/>                                              | <a href="#">11. HUMAN HGNC=15553 UniProtKB=Q96SF2</a> | HUMAN HGNC=15553 UniProtKB=Q96SF2 | T-complex protein 1 subunit theta-like 2<br><a href="#">CCT8L2</a><br><a href="#">ortholog</a>           | T-COMPLEX PROTEIN 1 SUBUNIT THETA-LIKE 1-RELATED<br>(PTHR11353:SF100) | <a href="#">chaperonin</a>  | Homo sapiens |

|                          |                                                             |                                  |                                                                                                  |                                                                                   |                            |                 |
|--------------------------|-------------------------------------------------------------|----------------------------------|--------------------------------------------------------------------------------------------------|-----------------------------------------------------------------------------------|----------------------------|-----------------|
| <input type="checkbox"/> | <b>12.</b> <a href="#">HUMAN HGNC=1618 UniProtKB=P48643</a> | HUMAN HGNC=1618 UniProtKB=P48643 | T-complex<br>protein 1<br>subunit<br>epsilon<br><a href="#">CCT5</a><br><a href="#">ortholog</a> | <a href="#">T-COMPLEX<br/>PROTEIN 1<br/>SUBUNIT EPSILON<br/>(PTHR11353:SF186)</a> | <a href="#">chaperonin</a> | Homo<br>sapiens |
|--------------------------|-------------------------------------------------------------|----------------------------------|--------------------------------------------------------------------------------------------------|-----------------------------------------------------------------------------------|----------------------------|-----------------|

Hits 1-12 of 12 [ page: (1) ]
