# Supplementary material for: The senescence-associated secretory phenotype (SASP) from mesenchymal stromal cells impairs growth of immortalized prostate cells but has no effect on metastatic prostatic cancer cells
Source: publisher site journal article supplement (doi:10.18632/aging.102172), 2019-08-14
Supplement: Supplementary file [file aging-v11i15-102172-supplementary-material-SD4.pdf]

**UPL14.0 New!** PANTHER14.0 is generated from the 2018\_04 release of [ReferenceProteome dataset](#)

**Analysis Summary:** Please report in publication [?](#)

**Analysis Type:** PANTHER Overrepresentation Test (Released 20181113)

---

**Annotation Version and Release Date:** GO Ontology database Released 2019-01-01

---

**Analyzed List:** Client Text Box Input (Homo sapiens) [Change](#)

---

**Reference List:** Homo sapiens (all genes in database) [Change](#)

---

**Annotation Data Set:**

---

**Test Type:**  Fisher's Exact  Binomial

---

**Correction:**  Calculate False Discovery Rate  Use the Bonferroni correction for multiple testing [?](#)  No correction

**Results** [?](#)

|                               | Reference list                     | Client Text Box Input        |
|-------------------------------|------------------------------------|------------------------------|
| Mapped IDs:                   | <a href="#">20996</a> out of 20996 | <a href="#">56</a> out of 56 |
| Unmapped IDs:                 | <a href="#">0</a>                  | <a href="#">7</a>            |
| Multiple mapping information: | 0                                  | <a href="#">0</a>            |

[Export results](#)

Displaying only results for FDR P < 0.05, [click here to display all results](#)

|                                                                                                       | Homo sapiens (REF)    | Client Text Box Input ( <a href="#">▼ Hierarchy</a> <b>NEW!</b> <a href="#">?</a> ) |          |                 |     |             |          |
|-------------------------------------------------------------------------------------------------------|-----------------------|-------------------------------------------------------------------------------------|----------|-----------------|-----|-------------|----------|
|                                                                                                       | #                     | #                                                                                   | expected | Fold Enrichment | +/- | raw P value | FDR      |
| <a href="#">GO molecular function complete</a>                                                        |                       |                                                                                     |          |                 |     |             |          |
| <a href="#">phosphoglucosyltransferase activity</a>                                                   | <a href="#">5</a>     | <a href="#">2</a>                                                                   | .01      | > 100           | +   | 1.45E-04    | 2.82E-02 |
| ↳ <a href="#">catalytic activity</a>                                                                  | <a href="#">6081</a>  | <a href="#">33</a>                                                                  | 16.22    | 2.03            | +   | 4.24E-06    | 1.53E-03 |
| <a href="#">unfolded protein binding</a>                                                              | <a href="#">131</a>   | <a href="#">10</a>                                                                  | .35      | 28.62           | +   | 3.60E-12    | 1.69E-08 |
| ↳ <a href="#">protein binding</a>                                                                     | <a href="#">11890</a> | <a href="#">48</a>                                                                  | 31.71    | 1.51            | +   | 4.64E-06    | 1.55E-03 |
| ↳ <a href="#">binding</a>                                                                             | <a href="#">15185</a> | <a href="#">55</a>                                                                  | 40.50    | 1.36            | +   | 5.21E-07    | 2.44E-04 |
| <a href="#">oxidoreductase activity, acting on the CH-OH group of donors, NAD or NADP as acceptor</a> | <a href="#">123</a>   | <a href="#">5</a>                                                                   | .33      | 15.24           | +   | 2.29E-05    | 5.96E-03 |
| ↳ <a href="#">oxidoreductase activity, acting on CH-OH group of donors</a>                            | <a href="#">134</a>   | <a href="#">5</a>                                                                   | .36      | 13.99           | +   | 3.40E-05    | 7.97E-03 |
| <a href="#">cadherin binding</a>                                                                      | <a href="#">315</a>   | <a href="#">6</a>                                                                   | .84      | 7.14            | +   | 2.05E-04    | 3.56E-02 |
| ↳ <a href="#">cell adhesion molecule binding</a>                                                      | <a href="#">483</a>   | <a href="#">7</a>                                                                   | 1.29     | 5.43            | +   | 3.07E-04    | 4.79E-02 |
| <a href="#">RNA binding</a>                                                                           | <a href="#">1659</a>  | <a href="#">22</a>                                                                  | 4.42     | 4.97            | +   | 9.33E-11    | 2.18E-07 |
| ↳ <a href="#">nucleic acid binding</a>                                                                | <a href="#">4123</a>  | <a href="#">23</a>                                                                  | 11.00    | 2.09            | +   | 2.62E-04    | 4.23E-02 |
| ↳ <a href="#">organic cyclic compound binding</a>                                                     | <a href="#">6145</a>  | <a href="#">35</a>                                                                  | 16.39    | 2.14            | +   | 3.53E-07    | 1.84E-04 |
| ↳ <a href="#">heterocyclic compound binding</a>                                                       | <a href="#">6058</a>  | <a href="#">35</a>                                                                  | 16.16    | 2.17            | +   | 2.97E-07    | 1.74E-04 |
| <a href="#">ATP binding</a>                                                                           | <a href="#">1499</a>  | <a href="#">13</a>                                                                  | 4.00     | 3.25            | +   | 1.31E-04    | 2.68E-02 |
| ↳ <a href="#">drug binding</a>                                                                        | <a href="#">1752</a>  | <a href="#">17</a>                                                                  | 4.67     | 3.64            | +   | 1.97E-06    | 8.40E-04 |
| ↳ <a href="#">adenyl ribonucleotide binding</a>                                                       | <a href="#">1556</a>  | <a href="#">13</a>                                                                  | 4.15     | 3.13            | +   | 1.90E-04    | 3.43E-02 |
| ↳ <a href="#">adenyl nucleotide binding</a>                                                           | <a href="#">1569</a>  | <a href="#">13</a>                                                                  | 4.18     | 3.11            | +   | 2.06E-04    | 3.45E-02 |
| ↳ <a href="#">purine nucleotide binding</a>                                                           | <a href="#">1928</a>  | <a href="#">17</a>                                                                  | 5.14     | 3.31            | +   | 7.15E-06    | 2.09E-03 |
| ↳ <a href="#">nucleotide binding</a>                                                                  | <a href="#">2169</a>  | <a href="#">21</a>                                                                  | 5.79     | 3.63            | +   | 7.63E-08    | 5.96E-05 |
| ↳ <a href="#">nucleoside phosphate binding</a>                                                        | <a href="#">2170</a>  | <a href="#">21</a>                                                                  | 5.79     | 3.63            | +   | 7.69E-08    | 5.15E-05 |
| ↳ <a href="#">small molecule binding</a>                                                              | <a href="#">2553</a>  | <a href="#">23</a>                                                                  | 6.81     | 3.38            | +   | 5.16E-08    | 6.04E-05 |
| ↳ <a href="#">purine ribonucleotide binding</a>                                                       | <a href="#">1913</a>  | <a href="#">17</a>                                                                  | 5.10     | 3.33            | +   | 6.45E-06    | 2.01E-03 |
| ↳ <a href="#">ribonucleotide binding</a>                                                              | <a href="#">1928</a>  | <a href="#">17</a>                                                                  | 5.14     | 3.31            | +   | 7.15E-06    | 1.97E-03 |
| ↳ <a href="#">carbohydrate derivative binding</a>                                                     | <a href="#">2242</a>  | <a href="#">23</a>                                                                  | 5.98     | 3.85            | +   | 4.45E-09    | 6.94E-06 |
| ↳ <a href="#">purine ribonucleoside triphosphate binding</a>                                          | <a href="#">1849</a>  | <a href="#">17</a>                                                                  | 4.93     | 3.45            | +   | 4.09E-06    | 1.60E-03 |
|                                                                                                       | <a href="#">2809</a>  | <a href="#">24</a>                                                                  | 7.49     | 3.20            | +   | 6.26E-08    | 5.87E-05 |

|                                    |                      |                    |       |        |   |          |          |
|------------------------------------|----------------------|--------------------|-------|--------|---|----------|----------|
| <a href="#">anion binding</a>      |                      |                    |       |        |   |          |          |
| <a href="#">ion binding</a>        | <a href="#">6287</a> | <a href="#">32</a> | 16.77 | 1.91   | + | 2.70E-05 | 6.65E-03 |
| <a href="#">hydrolase activity</a> | <a href="#">2723</a> | <a href="#">18</a> | 7.26  | 2.48   | + | 1.69E-04 | 3.16E-02 |
| Unclassified                       | <a href="#">3290</a> | <a href="#">0</a>  | 8.78  | < 0.01 | - | 1.29E-04 | 2.89E-02 |

**UPL14.0 New!** PANTHER14.0 is generated from the 2018\_04 release of [ReferenceProteome dataset](#)

Analysis Summary: Please report in publication [?](#)

**Analysis Type:** PANTHER Overrepresentation Test (Released 20181113)

---

**Annotation Version and Release Date:** Reactome version 65 Released 2018-06-12

---

**Analyzed List:** Client Text Box Input (Homo sapiens) [Change](#)

---

**Reference List:** Homo sapiens (all genes in database) [Change](#)

---

**Annotation Data Set:**

---

**Test Type:**  Fisher's Exact  Binomial

---

**Correction:**  Calculate False Discovery Rate  Use the Bonferroni correction for multiple testing [?](#)  No correction

**Results** [?](#)

|                               | Reference list                     | Client Text Box Input        |
|-------------------------------|------------------------------------|------------------------------|
| Mapped IDs:                   | <a href="#">20996</a> out of 20996 | <a href="#">56</a> out of 56 |
| Unmapped IDs:                 | <a href="#">0</a>                  | <a href="#">7</a>            |
| Multiple mapping information: | <a href="#">0</a>                  | <a href="#">0</a>            |

[Export results](#)

Displaying only results for FDR P < 0.05, [click here to display all results](#)

|                                                                                                    | Homo sapiens (REF)   | Client Text Box Input ( <a href="#">Hierarchy</a> <b>NEW!</b> <a href="#">?</a> ) |          |                 |     |             |          |
|----------------------------------------------------------------------------------------------------|----------------------|-----------------------------------------------------------------------------------|----------|-----------------|-----|-------------|----------|
|                                                                                                    | #                    | #                                                                                 | expected | Fold Enrichment | +/- | raw P value | FDR      |
| <a href="#">Reactome pathways</a>                                                                  |                      |                                                                                   |          |                 |     |             |          |
| <a href="#">Folding of actin by CCT/TriC</a>                                                       | <a href="#">10</a>   | <a href="#">6</a>                                                                 | .03      | > 100           | +   | 2.11E-12    | 2.31E-09 |
| ↳ <a href="#">Cooperation of Prefoldin and TriC/CCT in actin and tubulin folding</a>               | <a href="#">32</a>   | <a href="#">7</a>                                                                 | .09      | 82.02           | +   | 9.20E-12    | 5.04E-09 |
| ↳ <a href="#">Chaperonin-mediated protein folding</a>                                              | <a href="#">94</a>   | <a href="#">7</a>                                                                 | .25      | 27.92           | +   | 9.07E-09    | 1.99E-06 |
| ↳ <a href="#">Protein folding</a>                                                                  | <a href="#">100</a>  | <a href="#">7</a>                                                                 | .27      | 26.24           | +   | 1.36E-08    | 2.70E-06 |
| ↳ <a href="#">Metabolism of proteins</a>                                                           | <a href="#">2078</a> | <a href="#">24</a>                                                                | 5.54     | 4.33            | +   | 1.55E-10    | 6.78E-08 |
| <a href="#">Formation of tubulin folding intermediates by CCT/TriC</a>                             | <a href="#">25</a>   | <a href="#">7</a>                                                                 | .07      | > 100           | +   | 2.04E-12    | 4.47E-09 |
| <a href="#">Prefoldin mediated transfer of substrate to CCT/TriC</a>                               | <a href="#">27</a>   | <a href="#">7</a>                                                                 | .07      | 97.20           | +   | 3.25E-12    | 2.37E-09 |
| <a href="#">BBSome-mediated cargo-targeting to cilium</a>                                          | <a href="#">23</a>   | <a href="#">4</a>                                                                 | .06      | 65.20           | +   | 7.53E-07    | 1.37E-04 |
| ↳ <a href="#">Cargo trafficking to the periciliary membrane</a>                                    | <a href="#">51</a>   | <a href="#">4</a>                                                                 | .14      | 29.41           | +   | 1.38E-05    | 1.90E-03 |
| ↳ <a href="#">Cilium Assembly</a>                                                                  | <a href="#">200</a>  | <a href="#">6</a>                                                                 | .53      | 11.25           | +   | 1.76E-05    | 2.15E-03 |
| ↳ <a href="#">Organelle biogenesis and maintenance</a>                                             | <a href="#">292</a>  | <a href="#">8</a>                                                                 | .78      | 10.27           | +   | 1.22E-06    | 2.05E-04 |
| <a href="#">Association of TriC/CCT with target proteins during biosynthesis</a>                   | <a href="#">38</a>   | <a href="#">6</a>                                                                 | .10      | 59.20           | +   | 1.76E-09    | 5.50E-07 |
| <a href="#">Cooperation of PDCL (PhLP1) and TRiC/CCT in G-protein beta folding</a>                 | <a href="#">42</a>   | <a href="#">6</a>                                                                 | .11      | 53.56           | +   | 3.03E-09    | 8.29E-07 |
| <a href="#">Gene and protein expression by JAK-STAT signaling after Interleukin-12 stimulation</a> | <a href="#">38</a>   | <a href="#">3</a>                                                                 | .10      | 29.60           | +   | 1.77E-04    | 1.76E-02 |
| ↳ <a href="#">Interleukin-12 signaling</a>                                                         | <a href="#">47</a>   | <a href="#">3</a>                                                                 | .13      | 23.93           | +   | 3.20E-04    | 2.69E-02 |
| ↳ <a href="#">Interleukin-12 family signaling</a>                                                  | <a href="#">57</a>   | <a href="#">3</a>                                                                 | .15      | 19.73           | +   | 5.48E-04    | 4.29E-02 |
| ↳ <a href="#">Immune System</a>                                                                    | <a href="#">2035</a> | <a href="#">18</a>                                                                | 5.43     | 3.32            | +   | 3.34E-06    | 5.22E-04 |
| <a href="#">Phase II - Conjugation of compounds</a>                                                | <a href="#">108</a>  | <a href="#">4</a>                                                                 | .29      | 13.89           | +   | 2.25E-04    | 1.97E-02 |
| ↳ <a href="#">Metabolism</a>                                                                       | <a href="#">2061</a> | <a href="#">17</a>                                                                | 5.50     | 3.09            | +   | 1.72E-05    | 2.21E-03 |
| <a href="#">Host Interactions of HIV factors</a>                                                   | <a href="#">125</a>  | <a href="#">4</a>                                                                 | .33      | 12.00           | +   | 3.86E-04    | 3.13E-02 |
| ↳ <a href="#">HIV Infection</a>                                                                    | <a href="#">228</a>  | <a href="#">6</a>                                                                 | .61      | 9.87            | +   | 3.61E-05    | 4.16E-03 |
| ↳ <a href="#">Infectious disease</a>                                                               | <a href="#">370</a>  | <a href="#">7</a>                                                                 | .99      | 7.09            | +   | 6.09E-05    | 6.67E-03 |
| ↳ <a href="#">Disease</a>                                                                          | <a href="#">1023</a> | <a href="#">11</a>                                                                | 2.73     | 4.03            | +   | 7.41E-05    | 7.73E-03 |
| <a href="#">G2/M Transition</a>                                                                    | <a href="#">195</a>  | <a href="#">5</a>                                                                 | .52      | 9.61            | +   | 1.90E-04    | 1.81E-02 |

|                                          |                       |                    |       |      |   |          |          |
|------------------------------------------|-----------------------|--------------------|-------|------|---|----------|----------|
| <a href="#">↳Mitotic G2-G2/M phases</a>  | <a href="#">197</a>   | <a href="#">5</a>  | .53   | 9.52 | + | 1.99E-04 | 1.81E-02 |
| <a href="#">Neutrophil degranulation</a> | <a href="#">479</a>   | <a href="#">12</a> | 1.28  | 9.39 | + | 4.99E-09 | 1.21E-06 |
| <a href="#">↳Innate Immune System</a>    | <a href="#">1102</a>  | <a href="#">13</a> | 2.94  | 4.42 | + | 5.41E-06 | 7.90E-04 |
| <a href="#">Axon guidance</a>            | <a href="#">550</a>   | <a href="#">7</a>  | 1.47  | 4.77 | + | 6.60E-04 | 4.98E-02 |
| Unclassified                             | <a href="#">10452</a> | <a href="#">6</a>  | 27.88 | .22  | - | 1.01E-09 | 3.70E-07 |
