# Supplementary material for: The senescence-associated secretory phenotype (SASP) from mesenchymal stromal cells impairs growth of immortalized prostate cells but has no effect on metastatic prostatic cancer cells
Source: publisher site journal article supplement (doi:10.18632/aging.102172), 2019-08-14
Supplement: Supplementary file [file aging-v11i15-102172-supplementary-material-SD5.pdf]

\*\*\* Welcome to DAVID 6.8 \*\*\*  
 \*\*\* If you are looking for [DAVID 6.7](#), please visit our [development site](#). \*\*\*

## Functional Annotation Clustering

[Help and Manual](#)

**Current Gene List: SASP protein content**  
**Current Background: Homo sapiens**  
**62 DAVID IDs**

**Options**      **Classification Stringency**

  

**9 Cluster(s)**

[Download File](#)

| Annotation Cluster 1     |                  | Enrichment Score: 6.94                                                                   |                    |  | Count | P_Value | Benjamini |
|--------------------------|------------------|------------------------------------------------------------------------------------------|--------------------|--|-------|---------|-----------|
| <input type="checkbox"/> | GOTERM_BP_DIRECT | <a href="#">positive regulation of protein localization to Cajal body</a>                | <a href="#">RT</a> |  | 6     | 3.0E-11 | 1.4E-8    |
| <input type="checkbox"/> | INTERPRO         | <a href="#">Chaperonin TCP-1, conserved site</a>                                         | <a href="#">RT</a> |  | 6     | 3.7E-11 | 9.2E-9    |
| <input type="checkbox"/> | GOTERM_CC_DIRECT | <a href="#">chaperonin-containing T-complex</a>                                          | <a href="#">RT</a> |  | 6     | 4.4E-11 | 3.9E-9    |
| <input type="checkbox"/> | GOTERM_BP_DIRECT | <a href="#">positive regulation of establishment of protein localization to telomere</a> | <a href="#">RT</a> |  | 6     | 6.7E-11 | 1.6E-8    |
| <input type="checkbox"/> | INTERPRO         | <a href="#">Chaperone tailless complex polypeptide 1 (TCP-1)</a>                         | <a href="#">RT</a> |  | 6     | 2.3E-10 | 2.9E-8    |
| <input type="checkbox"/> | INTERPRO         | <a href="#">TCP-1-like chaperonin intermediate domain</a>                                | <a href="#">RT</a> |  | 6     | 2.3E-10 | 2.9E-8    |
| <input type="checkbox"/> | INTERPRO         | <a href="#">GroEL-like equatorial domain</a>                                             | <a href="#">RT</a> |  | 6     | 8.7E-10 | 7.2E-8    |
| <input type="checkbox"/> | INTERPRO         | <a href="#">Chaperonin Cpn60/TCP-1</a>                                                   | <a href="#">RT</a> |  | 6     | 1.3E-9  | 7.8E-8    |
| <input type="checkbox"/> | INTERPRO         | <a href="#">GroEL-like apical domain</a>                                                 | <a href="#">RT</a> |  | 6     | 1.3E-9  | 7.8E-8    |
| <input type="checkbox"/> | GOTERM_BP_DIRECT | <a href="#">positive regulation of telomerase RNA localization to Cajal body</a>         | <a href="#">RT</a> |  | 6     | 1.6E-9  | 2.5E-7    |
| <input type="checkbox"/> | GOTERM_MF_DIRECT | <a href="#">unfolded protein binding</a>                                                 | <a href="#">RT</a> |  | 9     | 5.6E-9  | 5.2E-7    |
| <input type="checkbox"/> | GOTERM_CC_DIRECT | <a href="#">zona pellucida receptor complex</a>                                          | <a href="#">RT</a> |  | 5     | 1.4E-8  | 4.2E-7    |
| <input type="checkbox"/> | GOTERM_BP_DIRECT | <a href="#">positive regulation of telomere maintenance via telomerase</a>               | <a href="#">RT</a> |  | 6     | 1.0E-7  | 1.2E-5    |
| <input type="checkbox"/> | UP_KEYWORDS      | <a href="#">Chaperone</a>                                                                | <a href="#">RT</a> |  | 9     | 1.4E-7  | 5.5E-6    |
| <input type="checkbox"/> | GOTERM_BP_DIRECT | <a href="#">protein folding</a>                                                          | <a href="#">RT</a> |  | 9     | 2.7E-7  | 2.6E-5    |
| <input type="checkbox"/> | GOTERM_CC_DIRECT | <a href="#">cell body</a>                                                                | <a href="#">RT</a> |  | 6     | 2.2E-6  | 4.8E-5    |
| <input type="checkbox"/> | GOTERM_BP_DIRECT | <a href="#">binding of sperm to zona pellucida</a>                                       | <a href="#">RT</a> |  | 5     | 7.6E-6  | 6.0E-4    |
| <input type="checkbox"/> | GOTERM_BP_DIRECT | <a href="#">toxin transport</a>                                                          | <a href="#">RT</a> |  | 5     | 8.5E-6  | 5.7E-4    |
| <input type="checkbox"/> | UP_KEYWORDS      | <a href="#">Nucleotide-binding</a>                                                       | <a href="#">RT</a> |  | 17    | 4.6E-5  | 1.5E-3    |
| <input type="checkbox"/> | GOTERM_BP_DIRECT | <a href="#">scaRNA localization to Cajal body</a>                                        | <a href="#">RT</a> |  | 3     | 7.8E-5  | 4.6E-3    |
| <input type="checkbox"/> | GOTERM_BP_DIRECT | <a href="#">protein stabilization</a>                                                    | <a href="#">RT</a> |  | 6     | 1.3E-4  | 7.0E-3    |
| <input type="checkbox"/> | UP_KEYWORDS      | <a href="#">ATP-binding</a>                                                              | <a href="#">RT</a> |  | 14    | 1.8E-4  | 4.2E-3    |
| <input type="checkbox"/> | GOTERM_CC_DIRECT | <a href="#">microtubule</a>                                                              | <a href="#">RT</a> |  | 7     | 5.9E-4  | 8.1E-3    |
| <input type="checkbox"/> | GOTERM_MF_DIRECT | <a href="#">ATP binding</a>                                                              | <a href="#">RT</a> |  | 15    | 7.3E-4  | 2.7E-2    |
| <input type="checkbox"/> | GOTERM_BP_DIRECT | <a href="#">positive regulation of telomerase activity</a>                               | <a href="#">RT</a> |  | 3     | 4.9E-3  | 1.8E-1    |
| Annotation Cluster 2     |                  | Enrichment Score: 2.99                                                                   |                    |  | Count | P_Value | Benjamini |
| <input type="checkbox"/> | GOTERM_MF_DIRECT | <a href="#">cadherin binding involved in cell-cell adhesion</a>                          | <a href="#">RT</a> |  | 8     | 8.1E-5  | 3.8E-3    |
| <input type="checkbox"/> | GOTERM_CC_DIRECT | <a href="#">cell-cell adherens junction</a>                                              | <a href="#">RT</a> |  | 8     | 9.9E-5  | 1.5E-3    |
| <input type="checkbox"/> | GOTERM_BP_DIRECT | <a href="#">cell-cell adhesion</a>                                                       | <a href="#">RT</a> |  | 7     | 4.4E-4  | 2.1E-2    |
| <input type="checkbox"/> | GOTERM_BP_DIRECT | <a href="#">viral process</a>                                                            | <a href="#">RT</a> |  | 3     | 3.0E-1  | 1.0E0     |
| Annotation Cluster 3     |                  | Enrichment Score: 2.98                                                                   |                    |  | Count | P_Value | Benjamini |
| <input type="checkbox"/> | INTERPRO         | <a href="#">NAD(P)-binding domain</a>                                                    | <a href="#">RT</a> |  | 7     | 2.4E-5  | 1.2E-3    |
| <input type="checkbox"/> | INTERPRO         | <a href="#">GroES-like</a>                                                               | <a href="#">RT</a> |  | 4     | 4.1E-5  | 1.7E-3    |
| <input type="checkbox"/> | UP_KEYWORDS      | <a href="#">Oxidoreductase</a>                                                           | <a href="#">RT</a> |  | 9     | 3.1E-4  | 6.2E-3    |
| <input type="checkbox"/> | SMART            | <a href="#">SM00829</a>                                                                  | <a href="#">RT</a> |  | 3     | 9.4E-4  | 3.9E-2    |
| <input type="checkbox"/> | INTERPRO         | <a href="#">Polyketide synthase, enoylreductase</a>                                      | <a href="#">RT</a> |  | 3     | 1.2E-3  | 4.1E-2    |
| <input type="checkbox"/> | INTERPRO         | <a href="#">Alcohol dehydrogenase, C-terminal</a>                                        | <a href="#">RT</a> |  | 3     | 1.2E-3  | 4.1E-2    |
| <input type="checkbox"/> | GOTERM_BP_DIRECT | <a href="#">oxidation-reduction process</a>                                              | <a href="#">RT</a> |  | 8     | 5.5E-3  | 1.8E-1    |
| <input type="checkbox"/> | UP_KEYWORDS      | <a href="#">NADP</a>                                                                     | <a href="#">RT</a> |  | 4     | 1.8E-2  | 2.2E-1    |
| <input type="checkbox"/> | GOTERM_MF_DIRECT | <a href="#">oxidoreductase activity</a>                                                  | <a href="#">RT</a> |  | 4     | 3.6E-2  | 5.7E-1    |

| Annotation Cluster 4     |                  |                                                |    |                                                                                       | Enrichment Score: 1.95 | G      |       | Count | P_Value | Benjamini |
|--------------------------|------------------|------------------------------------------------|----|---------------------------------------------------------------------------------------|------------------------|--------|---------------------------------------------------------------------------------------|-------|---------|-----------|
| <input type="checkbox"/> | GOTERM_CC_DIRECT | <a href="#">myelin sheath</a>                  | RT |      | 7                      | 1.2E-5 | 2.1E-4                                                                                |       |         |           |
| <input type="checkbox"/> | UP_KEYWORDS      | <a href="#">Mitochondrion</a>                  | RT |    | 9                      | 1.7E-2 | 2.2E-1                                                                                |       |         |           |
| <input type="checkbox"/> | GOTERM_CC_DIRECT | <a href="#">mitochondrial matrix</a>           | RT |    | 5                      | 2.4E-2 | 2.2E-1                                                                                |       |         |           |
| <input type="checkbox"/> | UP_SEQ_FEATURE   | transit peptide:Mitochondrion                  | RT |    | 4                      | 1.8E-1 | 1.0E0                                                                                 |       |         |           |
| <input type="checkbox"/> | UP_KEYWORDS      | <a href="#">Transit peptide</a>                | RT |    | 4                      | 2.1E-1 | 8.0E-1                                                                                |       |         |           |
| Annotation Cluster 5     |                  |                                                |    |                                                                                       | Enrichment Score: 0.79 | G      |    | Count | P_Value | Benjamini |
| <input type="checkbox"/> | GOTERM_MF_DIRECT | <a href="#">GTP binding</a>                    | RT |    | 5                      | 5.0E-2 | 6.2E-1                                                                                |       |         |           |
| <input type="checkbox"/> | GOTERM_MF_DIRECT | <a href="#">GTPase activity</a>                | RT |    | 3                      | 2.1E-1 | 9.6E-1                                                                                |       |         |           |
| <input type="checkbox"/> | UP_SEQ_FEATURE   | nucleotide phosphate-binding region:GTP        | RT |    | 3                      | 2.4E-1 | 1.0E0                                                                                 |       |         |           |
| <input type="checkbox"/> | UP_KEYWORDS      | <a href="#">GTP-binding</a>                    | RT |    | 3                      | 2.7E-1 | 8.4E-1                                                                                |       |         |           |
| Annotation Cluster 6     |                  |                                                |    |                                                                                       | Enrichment Score: 0.33 | G      |    | Count | P_Value | Benjamini |
| <input type="checkbox"/> | GOTERM_MF_DIRECT | <a href="#">calcium ion binding</a>            | RT |    | 6                      | 1.2E-1 | 8.3E-1                                                                                |       |         |           |
| <input type="checkbox"/> | UP_SEQ_FEATURE   | disulfide bond                                 | RT |    | 7                      | 9.0E-1 | 1.0E0                                                                                 |       |         |           |
| <input type="checkbox"/> | UP_KEYWORDS      | <a href="#">Disulfide bond</a>                 | RT |    | 7                      | 9.5E-1 | 1.0E0                                                                                 |       |         |           |
| Annotation Cluster 7     |                  |                                                |    |                                                                                       | Enrichment Score: 0.09 | G      |    | Count | P_Value | Benjamini |
| <input type="checkbox"/> | UP_KEYWORDS      | <a href="#">Cell membrane</a>                  | RT |    | 10                     | 6.1E-1 | 9.9E-1                                                                                |       |         |           |
| <input type="checkbox"/> | GOTERM_CC_DIRECT | <a href="#">plasma membrane</a>                | RT |    | 11                     | 9.1E-1 | 1.0E0                                                                                 |       |         |           |
| <input type="checkbox"/> | UP_KEYWORDS      | <a href="#">Membrane</a>                       | RT |    | 16                     | 9.8E-1 | 1.0E0                                                                                 |       |         |           |
| Annotation Cluster 8     |                  |                                                |    |                                                                                       | Enrichment Score: 0.06 | G      |    | Count | P_Value | Benjamini |
| <input type="checkbox"/> | GOTERM_CC_DIRECT | <a href="#">endoplasmic reticulum membrane</a> | RT |  | 4                      | 5.6E-1 | 1.0E0                                                                                 |       |         |           |
| <input type="checkbox"/> | UP_KEYWORDS      | <a href="#">Endoplasmic reticulum</a>          | RT |  | 4                      | 6.2E-1 | 9.9E-1                                                                                |       |         |           |
| <input type="checkbox"/> | UP_KEYWORDS      | <a href="#">Membrane</a>                       | RT |  | 16                     | 9.8E-1 | 1.0E0                                                                                 |       |         |           |
| <input type="checkbox"/> | UP_SEQ_FEATURE   | topological domain:Cytoplasmic                 | RT |  | 4                      | 1.0E0  | 1.0E0                                                                                 |       |         |           |
| <input type="checkbox"/> | GOTERM_CC_DIRECT | <a href="#">integral component of membrane</a> | RT |  | 8                      | 1.0E0  | 1.0E0                                                                                 |       |         |           |
| <input type="checkbox"/> | UP_KEYWORDS      | <a href="#">Transmembrane helix</a>            | RT |  | 7                      | 1.0E0  | 1.0E0                                                                                 |       |         |           |
| <input type="checkbox"/> | UP_KEYWORDS      | <a href="#">Transmembrane</a>                  | RT |  | 7                      | 1.0E0  | 1.0E0                                                                                 |       |         |           |
| <input type="checkbox"/> | UP_SEQ_FEATURE   | transmembrane region                           | RT |  | 6                      | 1.0E0  | 1.0E0                                                                                 |       |         |           |
| Annotation Cluster 9     |                  |                                                |    |                                                                                       | Enrichment Score: 0.03 | G      |  | Count | P_Value | Benjamini |
| <input type="checkbox"/> | UP_KEYWORDS      | <a href="#">Signal</a>                         | RT |  | 11                     | 8.2E-1 | 1.0E0                                                                                 |       |         |           |
| <input type="checkbox"/> | UP_SEQ_FEATURE   | signal peptide                                 | RT |  | 8                      | 9.0E-1 | 1.0E0                                                                                 |       |         |           |
| <input type="checkbox"/> | UP_KEYWORDS      | <a href="#">Glycoprotein</a>                   | RT |  | 10                     | 9.4E-1 | 1.0E0                                                                                 |       |         |           |
| <input type="checkbox"/> | UP_SEQ_FEATURE   | glycosylation site:N-linked (GlcNAc...)        | RT |  | 6                      | 1.0E0  | 1.0E0                                                                                 |       |         |           |
| <input type="checkbox"/> | UP_SEQ_FEATURE   | topological domain:Cytoplasmic                 | RT |  | 4                      | 1.0E0  | 1.0E0                                                                                 |       |         |           |

105 terms were not clustered.
